# Supplementary material for: Prospecting for informed dispersal: reappraisal of a widespread but overlooked ecological process
Source: Preprints.org preprint supplement (doi:10.20944/preprints202401.0428.v1), 2024-01-04
Supplement: Supplementary file 1 [file supplementary]

## Sheet: Supp_1
Nb	First author	Year	Journal	Species	Scientific name	Taxa	Region	Migratory	Sociality	Study	Method	Tracking	Continuous locations?	Group of prospectors	Function?	DOI
1	Amrhein	2004	Biol Lett	Nightingale	Luscinia megarhynchos	passerine	France	N	territorial	Experimental	VHF	Y	N	unmated males	Site selection	10.1098/rsbl.2003.0133
2	Arlt	2008	Jour Anim Ecol	Northern wheatear	Oenanthe oenanthe	passerine	Sweden	Y	territorial	Observational	ringing	N	N	all	Site selection	10.1111/j.1365-2656.2007.01329.x
3	Armstrong	1997	Jour Anim Ecol	Wild Atlantic salmon	Salmo salar	fish	UK	Y	territorial	Experimental	RFID	Y	N	young fish (parrs)	Site selection	10.2307/6022
4	Baccetti	2014	Mediterranean Waterbirds Bulletin	Audouin's gull	Larus audouinii	seabird	Sardinia	Y	colonial	Observational	GPS-UHF	Y	Y	breeders	Site selection	NA
5	Balbontin	2009	Bird Study	Bonelli's eagle	Aquila fasciata	raptor	Spain	N	territorial	Observational	VHF	Y	N	2nd years	Site selection	10.1080/00063650802648374
6	Barve	2020	Ecology	Acorn woodpecker	Melanerpes formicivorus	other bird	USA	N	cooperative	Observational	VHF	Y	N	breeders, helpers	Site selection	10.1002/ecy.2943
7	Bentzen	2015	Ibis	King eider	Somateria spectabilis	waterfowl	USA	Y	territorial	Observational	PTT	Y	Y		Site selection	https://doi.org/10.1111/ibi.12217
8	Blakey	2019	Forest Ecol Manag	California spotted owl	Strix occidentalis occidentalis	raptor	USA	N	territorial	Observational	GPS	Y	Y	non-breeding females	Site selection	https://doi.org/10.1016/j.foreco.2018.10.017
9	Bond	2021	Polar Biology	Tristan albatross	Diomedea dabbenena	seabird	Gough Island	Y	colonial	Observational	direct observations	N	N	Immature	Site selection	10.1007/s00300-020-02786-0
10	Boulinier	2016	ICB	Black-legged kittiwake	Rissa tridactyla	seabird	Norway	Y	colonial	Observational	GPS-UHF	Y	Y	FB	Site selection	10.1093/icb/icw015
11	Bradley	1999	Ibis	Short-tailed shearwater	Puffinus tenuirostris	seabird	Australia	Y	colonial	Observational	ringing	N	N	juveniles/immatures	Site selection	10.1111/j.1474-919X.1999.tb07550.x
12	Bruinzeel	2004	Behav Ecol	Oystercatcher	Haematopus ostralegus	shorebird	Netherlands	Y	territorial	Experimental	ringing	N	N	Floaters	Site selection	10.1093/beheco/arh019
13	Cadahia	2009	Acta Ornith	Bonelli's eagle	Aquila fasciata	raptor	Spain	?	territorial	Observational	PTT	Y	Y	immatures	Site selection	10.3161/000164509X482777
14	Calabuig	2010	Anim Behav	Lesser kestrel	Falco naumanni	raptor	Spain	Y	colonial	Experimental	VHF	Y	N	failed breeders	Site selection	10.1016/j.anbehav.2009.12.007
15	Campioni	2017	Anim Behav	Black-browed albatross	Thalassarche melanophris	seabird	Falklands	Y	colonial	Observational	GPS	Y	Y	Immatures (1-5yo)	Site selection	10.1093/beheco/arv167
16	Carter	2020	Wilson Jourf of Ornith	Indigo Bunting	Passerina cyanea	passerine	USA	?	cooperative	Observational	ringing	N	N	females	EPC	https://doi.org/10.1676/1559-4491.130.4.1032
17	Casazza	2020	Anim Behav	Ducks	Anas platyrhynchos - Mareca strepera - Spatula cyanoptera	waterfowl	USA	?	territorial	Observational	GPS-GSM	Y	Y	Successful females	Site selection	10.1016/j.anbehav.2020.04.013
18	Celis-Murillo	2017	Behav Ecol Sociol	Field sparrow	Spizella pusilla	passerine	USA	Partial	territorial	Observational	Automated VHF	Y	N	males and females	EPC	https://www.jstor.org/stable/44857211
19	Chiver	2008	Behav Ecol Sociol	Hooded warbler	Wilsonia citrina	passerine	USA	?	territorial	Observational	VHF	Y	N	females	EPC	10.1007/s00265-008-0629-x
20	Ciaglo	2020	Ecol & Evol	Flammulated owl	Psiloscops flammeolus	raptor	USA	Y	territorial	Observational	ringing	N	N	young, adults	Site selection	10.1002/ece3.7085
21	Conradt	2000	Proc Roy Soc B	Meadow brown butterfly	Maniola jurtina	insect	UK	?	non-territorial	Observational	direct observations	N	N	NA	Site selection	10.1098/rspb.2001.1939
22	Conradt	2006	Ecology	Meadow brown butterfly - Gatekeeper butterfly	Maniola jurtina - Pyronia tithonus	insect	UK	?	NA	Observational	direct observations	N	N	NA	Site selection	10.1890/05-0413
23	Cooper	2020	Curr Biol	Kirtkand's warbler	Setophaga kirtlandii	passerine	USA	Y	territorial	Observational	VHF	Y	N	FB, SB	Site selection	10.1016/j.cub.2020.07.056
24	Courtot	2012	Journ Wild Manag	Doubled-crested cormorant	Phalacrocorax auritus	seabird	USA	Y	colonial	Observational	PTT	Y	N	breeders	Site selection	10.1002/jwmg.403
25	Cox	2012	Behav Ecol	Red-bellied woodpecker	Melanerpes carolinus	other bird	USA	N	territorial	Observational	VHF	Y	N	fledgings	Site selection	10.1093/beheco/ars076
26	Cram	2018	Curr Biol	Meerkat	Suricata suricatta	mammal	South Africa	N	cooperative	Observational	ringing	N	N	dominants, helpers	Site selection	10.1016/j.cub.2018.07.021
27	Dale	2006	Ecography	Ortolan bunting	Emberiza hortulana	passerine	Norway	Y	territorial	Observational	ringing	N	N	Juveniles, adults	Site selection	10.1111/j.2006.0906-7590.04816.x
28	Davis	2017	The Auk	Piping plover	Charadrius melodus	shorebird	USA	Y	semi-colonial	Observational	ringing	N	N	fledgings, first-year	Site selection	10.1642/AUK-16-80.1
29	Debeffe	2014	Oecologia	Roe deer	Capreolus capreolus	mammal	Europe	N	territorial	Observational	GPS	Y	Y		EPC	10.1007/s00442-014-3021-
30	Debeffe	2013	Anim Behav	Roe deer	Capreolus capreolus	mammal	France	N	territorial	Observational	GPS	Y	Y	first year juveniles	Site selection	https://doi.org/10.1016/j.anbehav.2013.05.005
31	Deuel	2017	Wildlife Biology	Gray fox	Urocyon cinereoargenteus	mammal	USA	N	territorial	Observational	GPS	Y	Y	Adults	EPC	10.2981/wlb.00326
32	Dique	2003	Wildlife Research	Koala	Phascolarctos cinereus	mammal	Australia	N	social	Observational	VHF	Y	N	subadults, youg adults, adults both males and females	Site selection	10.1071/WR02043
33	Dittmann	2003	Anim Behav	Common tern	Sterna hirundo	seabird	Germany	Y	colonial	Observational	RFID	Y	N	Immatures (1-5yo)	Site selection	10.1006/anbe.2003.2128
34	Dittmann	2005	Anim Behav	Common tern	Sterna hirundo	seabird	Germany	Y	colonial	Observational	RFID	Y	N	Immatures (1-5yo)	Site selection	10.1016/j.anbehav.2004.09.015
35	Dittmann	2007	Behav Proc	Common tern	Sterna hirundo	seabird	Germany	Y	colonial	Observational	RFID	Y	N	Immatures (1-5yo)	Site selection	10.1016/j.beproc.2007.05.002
36	Doerr	2005	Oecologia	Brown treecreeper - white-throated treecreepers	Climacteris picumnus - Cormobates leucophaeus	passerine	Australia	?	territorial	Observational	VHF	Y	N	Fledglings	Site selection	10.1890/03-0015
37	Doligez	2002	Science	Collared flycatcher	Ficedulla albicolis	passerine	Sweden	Y	territorial	Experimental	ringing	N	N	NA	Site selection	10.1126/science.1072838
38	Doligez	2004	Anim Behav	Collared flycatcher	Ficedulla albicolis	passerine	Sweden	Y	territorial	Observational	ringing	N	N	adults	Site selection	10.1016/j.anbehav.2003.03.010
39	Doolan	1996	J Zool London	Slender-tailed meerkat	Suricata suricatta	mammal	South Africa	N	cooperative	Observational	ringing	N	N	adults	Site selection	NA
40	Double	2000	Proc Roy Soc B	Superb fairy wren	Malurus cyaneus	passerine	Australia	?	territorial	Observational	VHF	Y	N	females	EPC	10.1098/rspb.2000.1023
41	Ducros	2020	Oikos	Roe deer	Capreolus capreolus	mammal	France	N	territorial	Observational	GPS	Y	Y	juveniles	Site selection	10.1111/oik.06793
42	Eikenaar	2008	Journ Avian Biol	Seychelle warbler	Acrocephalus sechellensis	passerine	Seychelles	N	cooperative	Observational	VHF	Y	N	young male and female subordinates	Site selection	10.1111/j.2008.0908-8857.04124.x
43	Engler	2022	Ibis	White-tailed sea eagle	Haliaeetus albicilla	raptor	Germany	N	territorial	Observational	GPS-GSM	Y	Y	both juvenile males and females	Site selection	https://doi.org/10.1111/ibi.12967
44	Fasciolo	2016	Bird Study	Eagle owl	Bubo bubo	raptor	Spain	?	territorial	Observational	VHF	Y	N	Juvenile	Site selection	10.1080/00063657.2016.1141166
45	Fedy	2004	Auk	White-bellied Antbirds	Myrmeciza longipes	passerine	Panama	N	territorial	Experimental	VHF	Y	N		Site selection	https://doi.org/10.1093
46	Fijn	2014	Bird Study	Sandwick tern	Thalasseus sandvicensis	seabird	Netherlands	Y	colonial	Observational	GPS-UHF	Y	Y	FB	Site selection	10.1080/00063657.2014.950942
47	Gaughran	2019	Ecol & Evol	European badger	Meles meles	mammal	Ireland	N	territorial	Observational	GPS	Y	Y		Site selection	https://doi.org/10.1002/ece3.5753
48	Hale	2003	The Auk	Brown Jay	Cyanocorax morio	passerine	Costa Rica	?	cooperative/territorial	Observational	ringing	N	N	females, males, phipatric or immigrants	Site selection	10.1093/auk/120.2.446
49	Harrison	1991	Jour Mammal	Coyote	Canis latrans	mammal	USA	N	territorial	Observational	VHF	N	N	pups	Site selection	http://www.jstor.org/stable/1381839
50	Haughland	2004	Jour Anim Ecol	North American red squirrel	Tamiasciurus hudsonicus	mammal	Canada	N	territorial	Observational	VHF	Y	N	Juveniles	Site selection	10.1111/j.0021-8790.2004.00884.x
51	Honza	2002	Anim Behav	Common cuckoo	Cuculus canorus	other bird	Czech Republic	?	parasitic	Observational	VHF	Y	N	females	nest parasite	10.1006/anbe.2002.1969
52	Jungwirth	2015	Anim Behav	Cichlid fish	Neolamprologus pulcher	fish	Lake Tanganyika	N	cooperative	Observational	ringing	N	N	dominant and subordinates prospect	Site selection	10.1016/j.anbehav.2015.05.005
53	Kelly	2020	Scient Reports	European badger	Meles meles	mammal	Ireland	N	territorial	Observational	GPS	Y	Y	adults	Site selection	https://doi.org/10.1038/s41598-020-66809-w
54	Kesler	2007	The Auk	Pohnpei Micronesian Kingfisher	Todiramphus cinnamominus reichenbachii	passerine	Micronesia	?	cooperative/territorial	Observational	VHF	Y	N	Juveniles, helpers, adults, dominant	Site selection	10.1093/auk/124.2.381
55	Kesler	2010	Behav Ecol	Red-cockaded woodpecker	Picoides borealis	other bird	USA	N	cooperative/territorial	Observational	VHF	Y	N	juvenile females	Site selection	10.1093/beheco/arq158
56	Kingma	2016	Evolution	Seychelles warbler	Acrocephalus sechellensis	passerine	Seychelles	?	cooperative/territorial	Observational	ringing	N	N	subordinates	Site selection	10.1111/evo.13071
57	Kingma	2017	Behav Ecol	Seychelles warbler	Acrocephalus sechellensis	passerine	Seychelles	?	cooperative/territorial	Observational	ringing	N	N	subordinates	Site selection	1113–1121. doi:10.1093/beheco/arx075
58	Kleven	2006	Journ of Ornith	Reed bunting	Emberiza schoeniclus	passerine	Norway	?	territorial	Observational	ringing	N	N	males females	EPC	10.1007/s10336-005-0039-z
59	Kloskowski	2021	Scientific reports	Red‐necked grebe	Podiceps grisegena	waterfowl	Poland	?	territorial	Observational	ringing	N	N	breeders	Site selection	https://doi.org/10.1038/s41598-020-79942-3
60	Kolodzinski	2010	Am Mid Nat	White-tailed deer	Odocoilus virginianus	mammal	USA	?	territorial	Observational	GPS	Y	Y	breeding females	Site selection	https://doi.org/10.1674/0003-0031-163.2.366
61	Mabry	2008	Am Nat	Brush mouse	Peromyscus boylii	mammal	USA	N	social	Observational	VHF	Y	N	Juvenile	Site selection	10.1086/591682
62	Mancinelli	2018	Mammal Biol	Wolf	Canis lupus	mammal	Italy	N	territorial	Observational	GPS	Y	Y		Site selection	https://doi.org/10.1016/j.mambio.2018.08.003
63	Mares	2014	Anim Behav	Meerkat	Suricata suricatta	mammal	South Africa	N	cooperative	Observational	ringing	N	N	Subordinate males	Site selection	10.1016/j.anbehav.2013.11.025
64	Martinović	2019	Ethology Ecology & Evolution	Common tern	Sterna hirundo	seabird	Croatia	Y	colonial	Observational	GPS-UHF	Y	Y	SB	Site selection	10.1080/03949370.2019.1625952
65	Mayer	2017	Scient Reports	Eurasian beaver	Castor fiber	mammal	Norway	N	territorial	Observational	GPS	Y	Y		Site selection	https://doi.org/10.1038/s41598-017-15540-0
66	Mays	2004	Naturwissenschaften	Yellow-breasted chat	Icteria virens	passerine	USA	?	territorial	Observational	VHF	Y	N	females	EPC	10.1007/s00114-004-0510-3
67	Miron	1991	JEMBE	Polychaete	Nereis virens	annelid	Lab	N	territorial	Experimental	direct observations	N	N	NA	Site selection	10.1016/0022-0981(91)90006-I
68	Muriel	2016	Anim Behav	Spanish imperial eagle	Aquila adalberti	raptor	Spain	N	territorial	Observational	VHF	Y	N		Site selection	https://doi.org/10.1016/j.anbehav.2016.03.023
69	Naguib	2001	Journ of Ornith	Nightingale	Luscinia megarhynchos	passerine	Germany	?	territorial	Observational	VHF	Y	N		EPC	10.1007/BF01651369
70	Nicholson	2007	West North Amer Nat	Swift fox	Vulpes velox	mammal	USA	N	territorial	Observational	VHF	Y	N	adult males	Site selection	https://doi.org/10.3398/1527-0904(2007)67[102:DAEMOS]2.0.CO;2
71	Oro	2021	Oecologia	Audouin's gull	Larus audouinii	seabird	Spain	Y	colonial	Observational	GPS+PTT	Y	Y	FB; SB	Site selection	10.1007/s00442-021-05040-4
72	Ottosson	2001	The Auk	Pied flycatcher	Ficedulla hypoleuca	passerine	Sweden	Y	non-territorial	Observational	RFID	Y	N	SB, FB	Site selection	10.1642/0004-8038(2001)118[1069:naitpf]2.0.co;2
73	Part	2011	Jour Anim Ecol	Northern wheatear	Oenanthe oenanthe	passerine	Sweden	Y	territorial	Observational	ringing	N	N	non-breeders	Site selection	10.1111/j.1365-2656.2011.01854.x
74	Patchett	2022	Curr Zool	Cyprus wheatear	Oenanthe cypriaca	passerine	Cyprus	Y	territorial	Observational	direct observations	N	N	fledging	Site selection	https://doi.org/10.1093/cz/zoac002
75	Pedersen	2006	Anim Behav	Common yellowthroat	Geothlypis trichas	passerine	USA	?	territorial	Observational	VHF	Y	N	males females	EPC	https://doi.org/10.1016/j.anbehav.2006.02.010
76	Peron	2013	PlosOne	Cory's shearwater	Calonectris diomedea	seabird	France	Y	colonial	Observational	PTT	Y	Y	Immatures (1-5yo)	Site selection	10.1371/journal.pone.0072713
77	Piper	2006	Behav Ecol	Common loon	Gavia immer	seabird	USA	Y	territorial	Observational	ringing	N	N	breeding adults, non breeders, majority pre-breeders	Site selection	10.1093/beheco/arl021
78	Poessel	2022	Ecosphere	Golden eagle	Aquila chrysaetos	raptor	USA	Partial	territorial	Observational	PTT	Y	Y	juveniles, subadults	Site selection	https://doi.org/10.1002/ecs2.4072
79	Ponchon	2013	MEE	Collared flycatcher	Ficedulla albicolis	passerine	Sweden	Y	territorial	Observational	VHF	Y	N	FB, FLD, SB	Site selection	10.1111/j.2041-210x.2012.00259.x
80	Ponchon	2015	JEMBE	Black-legged kittiwake	Rissa tridactyla	seabird	Norway	Y	colonial	Experimental	GPS	Y	Y	FB	Site selection	10.1016/j.jembe.2015.08.013
81	Ponchon	2017	Mar Biol	Black-legged kittiwake	Rissa tridactyla	seabird	France	Y	colonial	Observational	GPS-UHF	Y	Y	Suspected FB	Site selection	10.1007/s00227-017-3151-8
82	Ponchon	2017	Anim Behav	Black-legged kittiwake	Rissa tridactyla	seabird	Norway	Y	colonial	Observational	GPS-UHF	Y	Y	FB	Site selection	10.1016.j.anbehav.2016.12.17
83	Poysa	1999	Journ Avian Biol	Common goldeneye	Bucephala clangula	waterfowl	Finland	?	parasitic	Experimental	ringing	N	N	females	nest parasite	https://doi.org/10.2307/3677246
84	Poysa	2006	Behav Ecol	Common goldeneye	Bucephala clangula	waterfowl	Finland	?	parasitic	Experimental	direct observations	N	N	females	nest parasite	10.1093/beheco/arj049
85	Rémy	2011	Jour Anim Ecol	Root vole	Microtus oeconomus	mammal	Norway	N	?	Experimental	RFID	Y	N	juveniles	Site selection	10.1111/j.1365-2656.2011.01849.x
86	Rendon	2001	Behav Ecol Sociol	Greater flamingo	Phoenicopterus ruber	other bird	Spain	Y	colonial	Observational	ringing	N	N	breeders	Site selection	10.1007/s002650100326
87	Riehl	2008	Wilson Jourf of Ornith	Back-headed trogo	Trogon melanocephalus	passerine	Costa Rica	?	territorial	Observational	ringing	N	N	males and females, sometimes in groups	Site selection	https://doi.org/10.1676/07-025.1
88	Roper	2003	Mammal review	Eurasian badger	Meles meles	mammal	UK	N	social	Observational	VHF	Y	N	NA	Site selection	10.1046/j.1365-2907.2003.00031.x
89	Roth	2009	Proc Roy Soc B	Nightingale	Luscinia megarhynchos	passerine	France	?	territorial	Experimental	ringing	N	N		Site selection	10.1098/rspb.2008.1726
90	Samelius	2011	Journ of Zool	Eurasian lynx	Lynx lynx	mammal	Scandinavia	N	territorial	Observational	VHF	Y	N	pre dispersal	Site selection	https://doi.org/10.1111/j.1469-7998.2011.00857.x
91	Sanchez-Tojar	2016	Journ Avian Biol	House sparrow	Passer domesticus	passerine	UK	N	territorial	Observational	RFID	Y	N	juveniles and adults	Site selection	10.1111/jav.01055
92	Scardamaglia	2017	Behav Ecol Sociol	Shiny cowbird/Screaming cowbird	Molothrus bonariensis/Molothrus rufoaxillaris	passerine	Argentina	?	parasitic	Observational	VHF	Y	N	females	nest parasite	10.1007/s00265-016-2250-8
93	Schjorring	1999	Anim Behav	Great cormorant	Phalacrocorax carbo	seabird	Denmark	Y	colonial	Observational	ringing	N	N	Juveniles	Site selection	10.1006/anbe.1998.0993
94	Schuett	2012	Behav Ecol Sociol	Jackdaw	Corvus monedula	passerine	Finland	N	social	Observational	RFID	Y	N	breeding adults	Site selection	10.1007/s00265-012-1389-1
95	Seeley	2001	Behav Ecol Sociol	Honey bee	Apis mellifera	insect	USA	N	colonial	Experimental	direct observations	N	N	NA	Site selection	10.1007/s002650000299
96	Selonen	2006	Jour Anim Ecol	Siberian flying squirrel	Pteromys volans	mammal	Finland	N	territorial	Observational	VHF	Y	N	Juveniles	Site selection	10.1111/j.1365-2656.2006.01168.x
97	Selonen	2010	Behav Ecol	Siberian flying squirrel	Pteromys volans	mammal	Finland	N	territorial	Observational	VHF	Y	N	Juveniles	Site selection	10.1093/beheco/arp179
98	Sicotte	2004	Behaviour	Colobus monkey	Colobus vellerosus	mammal	Ghana	N	social	Observational	direct observations	N	N	only males	Site selection	https://www.jstor.org/stable/4536149
99	Soulsbury	2011	Jour Mammal	Red fox	Vulpes vulpes	mammal	UK	N	social	Observational	VHF	Y	N	NA	Site selection	10.1644/09-mamm-a-187.1
100	Stutchbury	2005	Journ Avian Biol	Hooded warbler	Wilsonia citrina	passerine	USA	?	territorial	Observational	VHF	Y	N	male breeders	EPC	10.1126/science.1166664
101	Teichroeb	2011	Behaviour	Ursine colobus monkey	Colobus vellerosus	mammal	Ghana	N	social	Observational	direct observations	N	N	Alpha and non-dominant males	Site selection	https://www.jstor.org/stable/23034299
102	Therrien	2015	Mov Ecol	Snowy owl	Bubo scandiacus	raptor	Canada	?	territorial	Observational	PTT	Y	Y	adults	Site selection	https://doi.org/10.1186/s40462-015-0028-7
103	Thomson	2013	Behav Ecol Sociol	Pied flycatcher	Ficedula hypoleuca	passerine	Finland	Y	territorial	Observational	RFID	Y	N	active breeders and floaters	Site selection	10.1007/s00265-013-1513-x
104	Tobler	2004	Naturwissenschaften	European starling	Sturnus vulgaris	passerine	Sweden	Y	semi-colonial	Experimental	VHF	Y	N	non-breeder males (2 years)	Site selection	10.1007/s00114-003-0486-4
105	Trainor	2013	Landsc Ecol	Red-cockaded woodpecker	Picoides borealis	other bird	USA	?	cooperative/territorial	Observational	VHF	Y	N	juvenile females	Site selection	10.1007/s10980-013-9861-5
106	Urios	2007	Acta Ornith	Golden eagle	Aquila chrysaetos	raptor	Spain	N	territorial	Observational	PTT	Y	Y	ijuvenile (1-4 years)	Site selection	https://doi.org/10.3161/000164507783516791
107	van der Jeudg	2001	Behav Ecol	Barnacle goose	Branta leucopsis	waterfowl	Sweden	Y	colonial	Observational	ringing	N	N	Immatures (1-5yo)	Site selection	10.1093/beheco/12.3.275
108	Van Moorter	2008	Ethol Ecol Evol	Roe deer	Capreolus capreolus	mammal	France	N	territorial	Observational	VHF	Y	N	juveniles	Site selection	https://doi.org/10.1080/08927014.2008.9522539
109	Vangen	2001	Canad Jour Zool	Wolverine	Gulo gulo	mammal	Norway	N	territorial	Observational	VHF	Y	N	Juveniles	Site selection	10.1139/z01-124
110	Veiga	2012	Ethology	Spotless starling	Sturnus unicolor	passerine	Spain	N	semi-colonial	Observational	video-recording	Y	N	Yearlings (more) and breeding adults	Site selection	10.1111/j.1439-0310.2012.02083.x
111	Votier	2011	Mar Biol	Northern gannet	Morus bassanus	seabird	UK	Y	colonial	Observational	GPS-PTT+VHF	Y	Y	2-4 years	Site selection	10.1007/s00227-010-1563-9
112	Wails	2017	Canad Jour Zool	Least auklet - Crested auklet	Aethia pusilla - Aethia cristatella	seabird	USA	Y	colonial	Observational	direct observations	N	N	immatures vs adults	Site selection	10.1139/cjz-2016-0166
113	Ward	2005	Oecologia	Yellow-headed blackbird	Xanthocephalus xanthocephalus	passerine	USA	Y	territorial	Observational	ringing	N	N	breeding adults	Site selection	10.1007/s00442-005-0179-0
114	Ward	2014	Anim Behav	Yellow-breasted chat	Icterina virens	passerine	USA	Y	territorial	Observational	Automated VHF	Y	N	males, females	EPC	10.1016/j.anbehav.2013.11.024
115	Weston	2013	BMC Ecology	Golden eagle	Aquila chrysaeto	raptor	UK	N	territorial	Observational	GPS-PTT	Y	Y		Site selection	https://doi.org/10.1186/1472-6785-13-42
116	White	2007	Behav Ecol	Brown-headed cowbird	Molothrus ater	passerine	Lab	?	parasitic	Experimental	direct observations	N	N	juveniles and adult females	nest parasite	10.1093/beheco/arm062
117	White	2017	Proc Roy Soc B	Brown-headed cowbird	Molothrus ater	passerine	Canada	?	parasitic	Experimental	direct observations	N	N	females	nest parasite	10.1098/rspb.2017.1083
118	Williams	2005	Jour Anim Ecol	Brown jay	Cyanocorax morio	other bird	Costa Rica	?	cooperative	Observational	ringing	N	N		Site selection	10.1111/j.1365-2656.2004.00907.x
119	Wischhoff	2015	Journ of Ethol	White-rumped swallow	Tachycineta leucorrhoa	passerine	Brazil	Y	territorial	Observational	RFID	Y	N		Site selection	https://doi.org/10.1007/s10164-015-0425-9
120	Wolfson	2020	Ibis	Sandhill crane	Antigone canadensis	other bird	USA	Y	territorial	Observational	GPS-GSM	Y	Y	pre-breeders and adults	Site selection	10.1111/ibi.12786
121	Young	2005	Anim Behav	Meerkat	Suricata suricatta	mammal	South Africa	N	cooperative	Observational	ringing	N	N	Subordinate males	Site selection	10.1016/j.anbehav.2005.01.019
122	Young	2007	Proc Roy Soc B	Meerkat	Suricata suricatta	mammal	South Africa	N	cooperative	Observational	ringing	N	N	Subordinate males	Site selection	10.1098/rspb.2007.0316
123	Young	2009	Biol Lett	Meerkat	Suricata suricatta	mammal	South Africa	N	cooperative	Observational	ringing	N	N	Subordinate males	Site selection	10.1098/rsbl.2009.0032
124	Zangmeister	2009	Jour Field Ornith	Leach's storm-petrel	Oceanodroma leucorhoa	seabird	Canada	Y	colonial	Observational	RFID	Y	N	failed breeders	Site selection	10.1111/j.1557-9263.2009.00243.x
